# Supplementary material
Source: PubMed Central journal article supplement (PMC3735747)
Supplement: supp_120511_five-concussion-appendix_1.pdf [file supp_120511_five-concussion-appendix_1.pdf]

## Appendix 1: References

1. McCrory P, Meeuwisse WH, Aubry M, et al. Consensus statement on concussion in sport: the 4th International Conference on Concussion in Sport held in Zurich, November 2012. *Br J Sports Med* 2013;47:250-8.
2. Healthy Active Living Committee. *Evaluation and management of children and adolescents with sport-related concussion*. Ottawa (ON): Canadian Paediatric Society; 2012. Available: [www.cps.ca/en/documents/position/concussion-evaluation-management](http://www.cps.ca/en/documents/position/concussion-evaluation-management) (accessed 2013 Apr. 22).
3. Osmond MH, Klassen TP, Wells GA, et al.; Pediatric Emergency Research Canada (PERC) Head Injury Study Group. CATCH: a clinical decision rule for the use of computed tomography in children with minor head injury. *CMAJ* 2010;182:341-8.
4. Kuppermann N, Holmes JF, Dayan PS, et al. Pediatric Emergency Care Applied Network (PECARN). Identification of children at very low risk of clinically-important brain injuries after head trauma: a prospective cohort study. *Lancet* 2009;374:1160-70.
5. Stiell IG, Wells GA, Vandemheen K, et al. The Canadian CT Head Rule for patients with minor head injury. *Lancet* 2001;357:1391-6.
